# Supplementary material for: Role of solvent in the phosphatase activity of a dinuclear nickel(ii) complex of a Schiff base ligand: mechanistic interpretation by DFT studies
Source: Royal Society of Chemistry journal article supplement (doi:10.1039/c6nj01043a), 2016-01-01
Supplement: c6nj01043a1.pdf [file c6nj01043a1.pdf]

**ELECTRONIC SUPPLEMENTARY INFORMATION**

**Role of Solvent on phosphatase activity of a dinuclear Nickel(II) complex of a Schiff-base ligand: mechanistic interpretation by DFT studies**

Ria Sanyal,<sup>a,#</sup> Xuepeng Zhang,<sup>b,#</sup> Prateeti Chakraborty,<sup>a</sup> Sanjib Giri,<sup>a</sup> Shyamal Kumar Chattopadhyay,<sup>c</sup> Cunyuan Zhao\*<sup>b</sup> and Debasis Das\*<sup>a</sup>

<sup>a</sup>*Department of Chemistry, University of Calcutta, 92, A.P.C Road, Kolkata – 700 009, India*

<sup>b</sup>*School of Chemistry and Chemical Engineering, Sun Yat-Sen University, Guangzhou 510275, P. R. China.*

<sup>c</sup>*Department of Chemistry, Indian Institute of Engineering Science and Technology, Howrah 711 103, India.*

Corresponding authors. Tel.: +91 33 24837031; fax: +91 33 23519755.

E-mail address: [dasdebasis2001@yahoo.com](mailto:dasdebasis2001@yahoo.com) (D.Das)

[ceszhcy@mail.sysu.edu.cn](mailto:ceszhcy@mail.sysu.edu.cn) (C. Zhao)

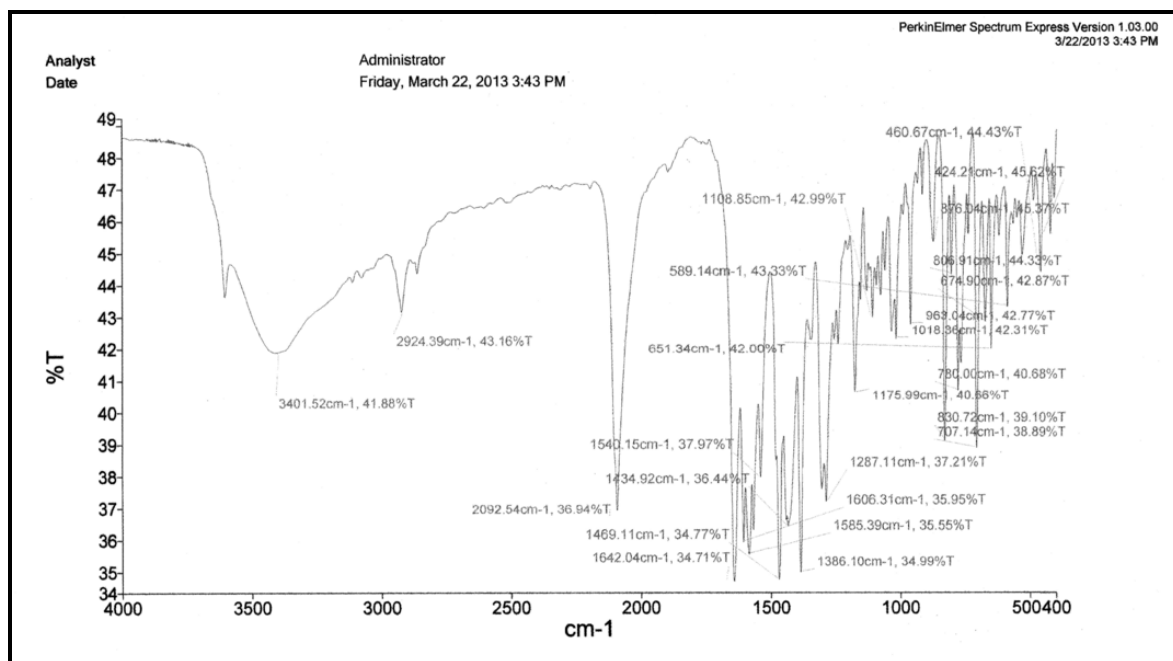

Fig. S1 FT-IR spectrum of complex at 298 K.

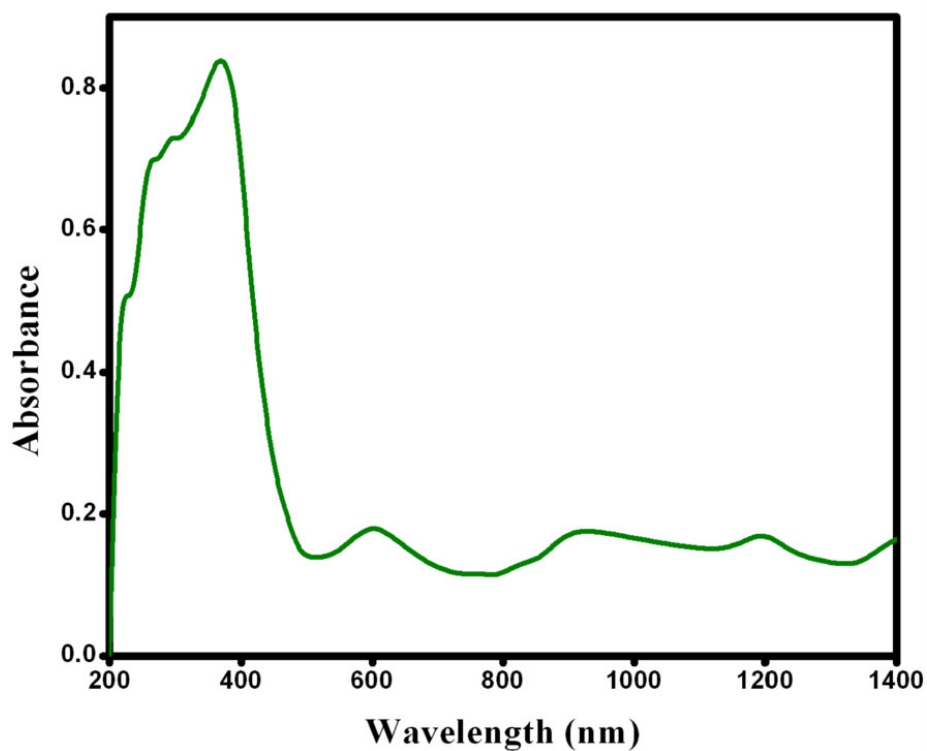

Fig. S2 Absorption spectra of complex in the solid phase at 298K.

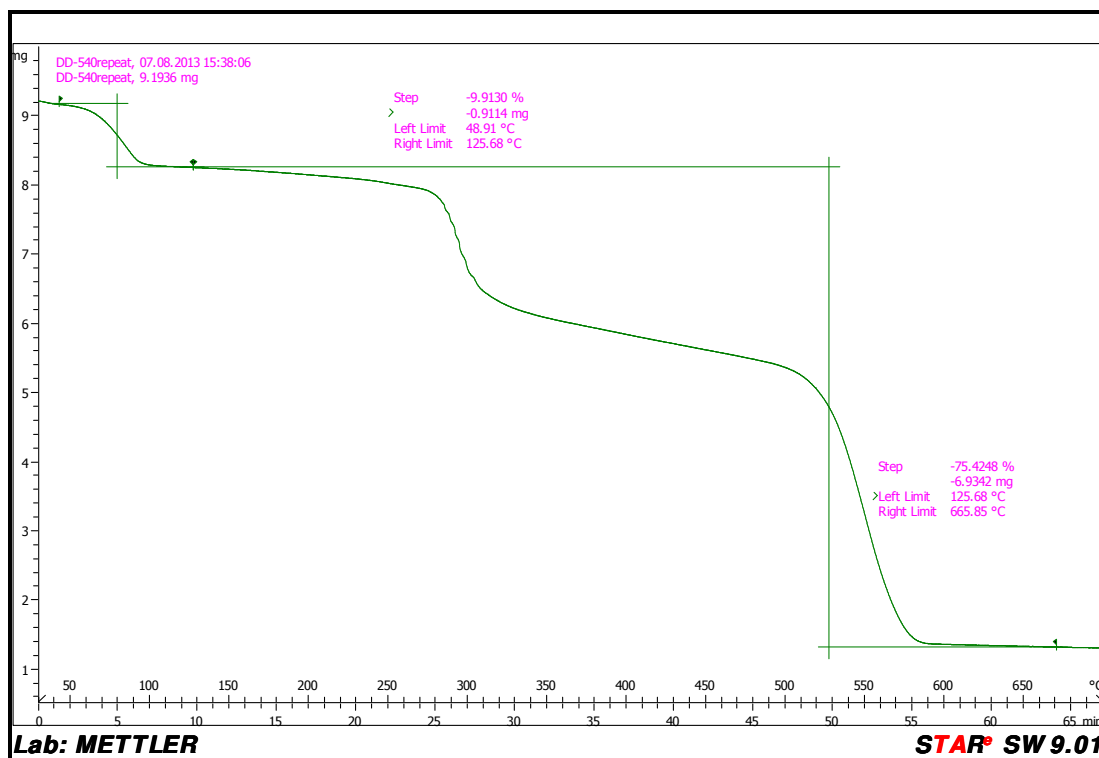

Fig. S3 TGA curve of complex from 30°C – 700°C.

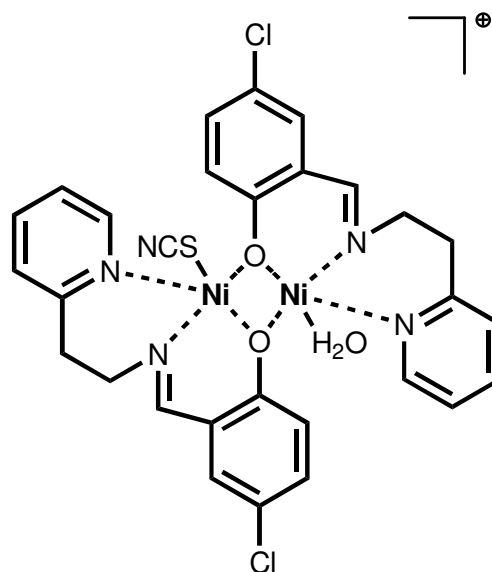

Fig. S4 Solution-state structure of the complex in acetonitrile and DMF.

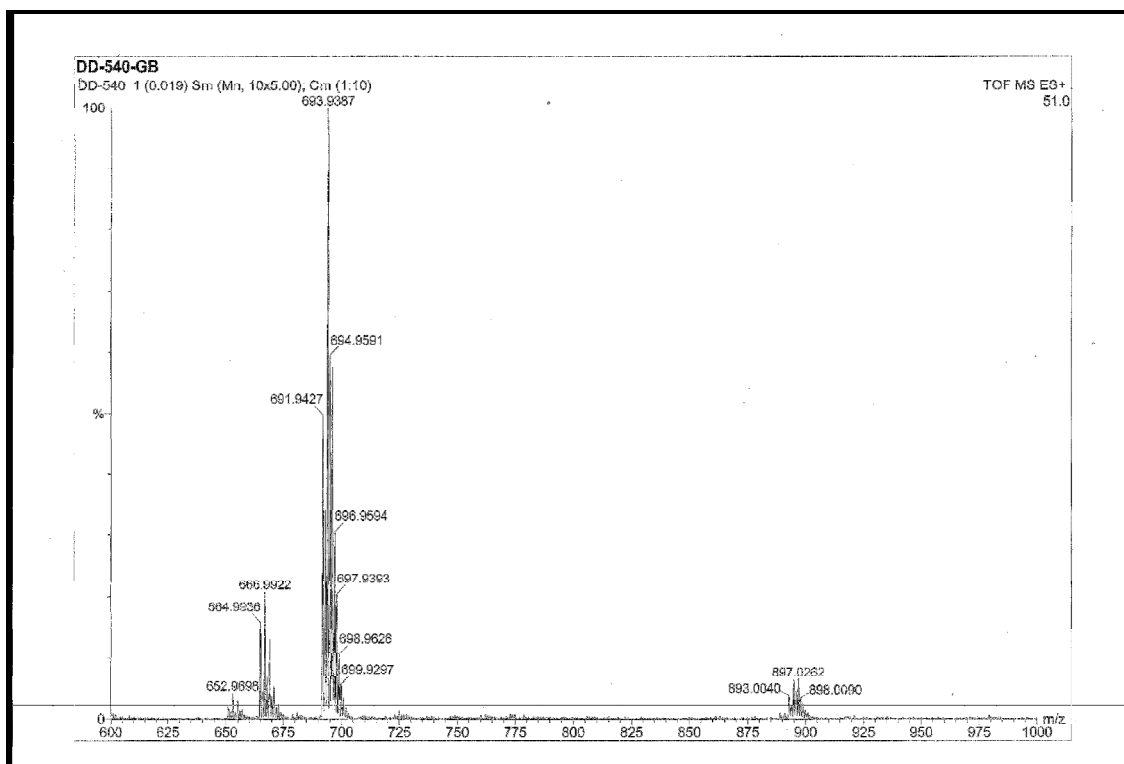

Fig. S5 ESI-MS of complex in acetonitrile.

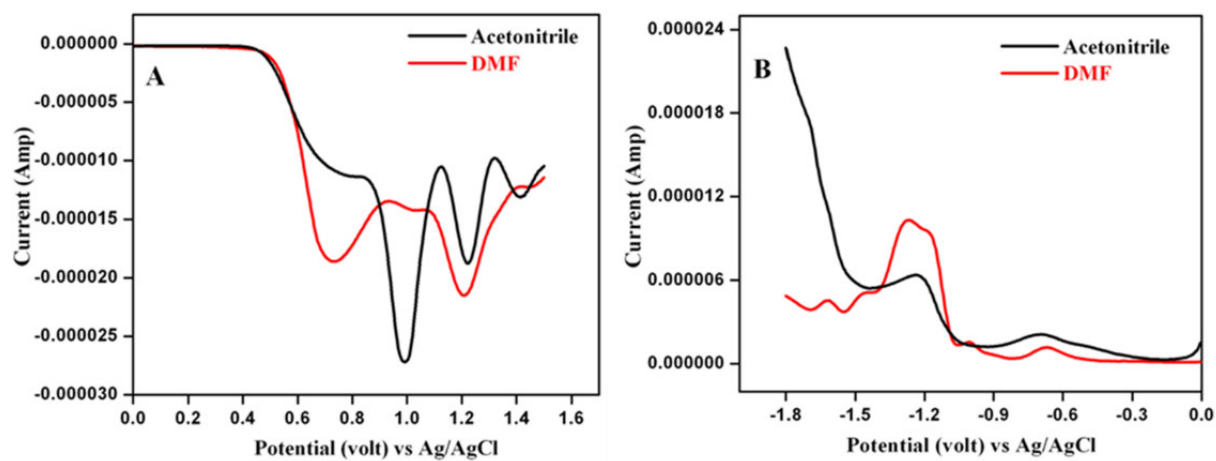

Fig. S6 Differential Pulse Voltammogram of complex in acetonitrile and DMF.

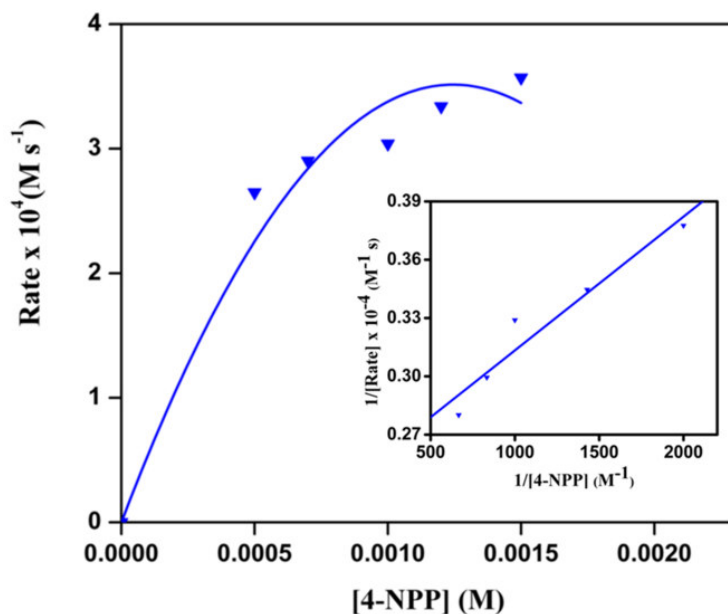

**Fig. S7** Kinetic plot of  $V$  vs  $S$  for phosphatase activity where  $V$  = initial rate and  $[S] = [4\text{-NPP}]$ .

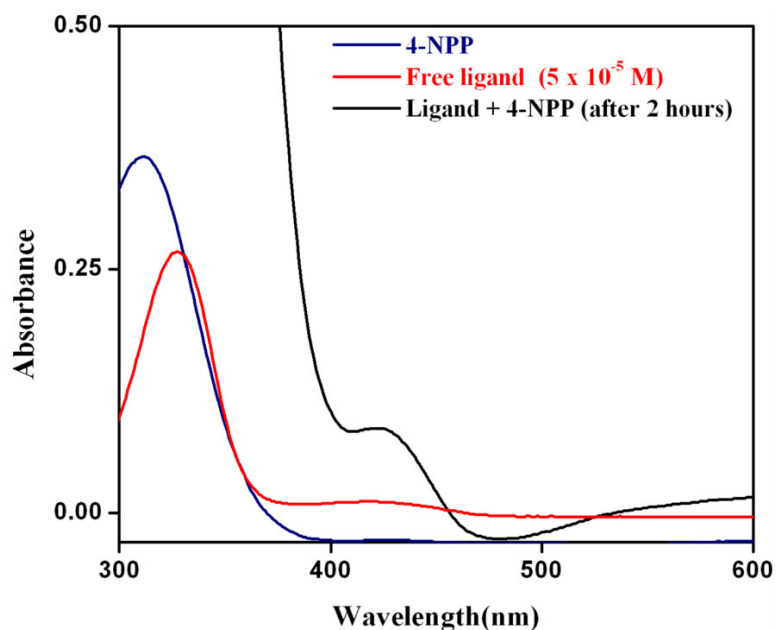

**Fig. S8** Control experiment of phosphatase activity with free ligand HL. Conditions:  $[4\text{-NPP}] = 1 \times 10^{-3}$  (M),  $[\text{HL}] = 5 \times 10^{-5}$  (M), Temperature = 298 K.

**Table S1** Selected Coordination Bond Lengths (Å) and Angles (deg) with Esds in Parentheses.

|            |          |            |          |
|------------|----------|------------|----------|
| Ni(1)-O(1) | 2.076(5) | Ni(2)-O(2) | 2.063(5) |
| Ni(1)-N(1) | 2.067(6) | Ni(2)-N(3) | 2.081(6) |

|                 |           |                 |           |
|-----------------|-----------|-----------------|-----------|
| Ni(1)-N(2)      | 2.132(6)  | Ni(2)-N(4)      | 2.137(7)  |
| Ni(1)-O(2)      | 2.106(4)  | Ni(2)-O(1)      | 2.198(5)  |
| Ni(1)-O(5)      | 2.059(5)  | Ni(2)-O(4)      | 2.076(5)  |
| Ni(1)-O(3)      | 2.166(6)  | Ni(2)-N(5)      | 2.054(6)  |
|                 |           |                 |           |
| O(5)-Ni(1)-N(1) | 177.3(2)  | N(5)-Ni(2)-O(2) | 92.5(2)   |
| O(5)-Ni(1)-O(1) | 87.94(19) | N(5)-Ni(2)-O(4) | 88.3(2)   |
| N(1)-Ni(1)-O(1) | 90.0(2)   | O(2)-Ni(2)-O(4) | 88.0(2)   |
| O(5)-Ni(1)-O(2) | 88.24(19) | N(5)-Ni(2)-N(3) | 90.9(2)   |
| N(1)-Ni(1)-O(2) | 93.4(2)   | O(2)-Ni(2)-N(3) | 90.8(2)   |
| O(1)-Ni(1)-O(2) | 84.97(18) | O(4)-Ni(2)-N(3) | 178.5(2)  |
| O(5)-Ni(1)-N(2) | 89.0(2)   | N(5)-Ni(2)-N(4) | 93.3(2)   |
| N(1)-Ni(1)-N(2) | 92.9(2)   | O(2)-Ni(2)-N(4) | 173.6(2)  |
| O(1)-Ni(1)-N(2) | 176.1(2)  | O(4)-Ni(2)-N(4) | 89.6(3)   |
| O(2)-Ni(1)-N(2) | 97.48(19) | N(3)-Ni(2)-N(4) | 91.7(3)   |
| O(5)-Ni(1)-O(3) | 84.0(2)   | N(5)-Ni(2)-O(1) | 174.1(2)  |
| N(1)-Ni(1)-O(3) | 94.1(2)   | O(2)-Ni(2)-O(1) | 82.95(17) |
| O(1)-Ni(1)-O(3) | 88.0(2)   | O(4)-Ni(2)-O(1) | 87.71(18) |
| O(2)-Ni(1)-O(3) | 169.7(2)  | N(3)-Ni(2)-O(1) | 93.01(19) |
| N(2)-Ni(1)-O(3) | 89.2(2)   | N(4)-Ni(2)-O(1) | 91.1(2)   |

### Cartesian coordinates of optimized structures.

#### RC1-1

|    |          |          |          |
|----|----------|----------|----------|
| Ni | 2.81258  | -1.0596  | 0.79713  |
| Ni | -1.95099 | 1.38318  | -0.90715 |
| Cl | 8.04312  | 1.79244  | -3.35513 |
| Cl | -0.69624 | 7.11362  | 3.35418  |
| O  | 3.13242  | 0.20748  | -0.51815 |
| O  | -0.77572 | 2.07116  | 0.32643  |
| N  | 4.60585  | -1.73053 | 0.76033  |
| N  | 2.2601   | -2.22179 | 2.29505  |
| N  | -3.23211 | 2.78654  | -0.65099 |
| N  | -2.99194 | 0.51216  | -2.35306 |
| C  | 4.23851  | 0.52318  | -1.11378 |
| C  | 4.23005  | 1.59456  | -2.0551  |
| H  | 3.28741  | 2.10424  | -2.22599 |
| C  | 5.37687  | 1.97091  | -2.7203  |
| H  | 5.35355  | 2.79094  | -3.43148 |
| C  | 6.59258  | 1.29164  | -2.48522 |
| C  | 6.64637  | 0.24855  | -1.59106 |
| H  | 7.58128  | -0.27604 | -1.41499 |
| C  | 5.4789   | -0.1483  | -0.89022 |
| C  | 5.55647  | -1.24994 | 0.00996  |
| H  | 6.52788  | -1.75088 | 0.06126  |
| C  | 4.94188  | -2.91707 | 1.55954  |
| H  | 5.15251  | -2.6023  | 2.591    |
| H  | 5.85294  | -3.376   | 1.15855  |
| C  | 3.80839  | -3.94891 | 1.54776  |
| H  | 3.45401  | -4.09979 | 0.51717  |
| H  | 4.19265  | -4.90631 | 1.91531  |
| C  | 2.68232  | -3.49885 | 2.43342  |
| C  | 2.1271   | -4.33395 | 3.40736  |
| H  | 2.47185  | -5.36028 | 3.47991  |

|   |          |          |          |
|---|----------|----------|----------|
| C | 1.15201  | -3.84178 | 4.26941  |
| H | 0.71383  | -4.4837  | 5.02842  |
| C | 0.75853  | -2.51044 | 4.14558  |
| H | 0.01149  | -2.07293 | 4.79867  |
| C | 1.32426  | -1.73745 | 3.1394   |
| H | 1.01047  | -0.71882 | 2.95616  |
| C | -0.80049 | 3.19554  | 0.96513  |
| C | 0.3107   | 3.53376  | 1.7931   |
| H | 1.13468  | 2.82877  | 1.83224  |
| C | 0.33304  | 4.71441  | 2.50207  |
| H | 1.18719  | 4.96347  | 3.12428  |
| C | -0.75506 | 5.61479  | 2.42777  |
| C | -1.84753 | 5.32687  | 1.64592  |
| H | -2.68325 | 6.01889  | 1.59254  |
| C | -1.88724 | 4.11993  | 0.89895  |
| C | -3.03867 | 3.82427  | 0.11888  |
| H | -3.85618 | 4.5484   | 0.1863   |
| C | -4.54198 | 2.70493  | -1.31063 |
| H | -4.45324 | 3.08309  | -2.33815 |
| H | -5.25643 | 3.34593  | -0.78102 |
| C | -5.07501 | 1.26849  | -1.34031 |
| H | -6.1416  | 1.28366  | -1.58586 |
| H | -4.97625 | 0.81949  | -0.34333 |
| C | -4.34144 | 0.44918  | -2.36691 |
| C | -5.01953 | -0.29997 | -3.3313  |
| H | -6.1033  | -0.34598 | -3.30261 |
| C | -4.29871 | -0.97428 | -4.31379 |
| H | -4.81459 | -1.56329 | -5.06647 |
| C | -2.90929 | -0.87163 | -4.31285 |
| H | -2.30061 | -1.36747 | -5.06107 |
| C | -2.29151 | -0.13086 | -3.31174 |
| H | -1.21508 | -0.06712 | -3.22664 |
| O | 0.30135  | -2.34981 | -0.79078 |
| P | -0.04936 | -1.03195 | -0.13904 |
| O | 1.02893  | -0.39982 | 0.77146  |
| O | -0.73219 | -0.04899 | -1.13115 |
| O | -1.26356 | -1.31056 | 1.03645  |
| C | -2.48456 | -1.81567 | 0.76448  |
| C | -2.75264 | -2.67258 | -0.32314 |
| C | -3.52445 | -1.46247 | 1.64887  |
| C | -4.04517 | -3.13308 | -0.53417 |
| H | -1.9376  | -2.96556 | -0.97518 |
| C | -4.8144  | -1.9271  | 1.44138  |
| H | -3.29141 | -0.81404 | 2.48736  |
| C | -5.07124 | -2.7511  | 0.33833  |
| H | -4.27068 | -3.78993 | -1.36568 |
| H | -5.62372 | -1.65785 | 2.10941  |
| N | -6.43094 | -3.20311 | 0.08657  |
| O | -7.31832 | -2.86145 | 0.87946  |
| O | -6.642   | -3.89709 | -0.91654 |
| O | 2.3531   | -4.05925 | -1.33841 |
| H | 2.60013  | -3.86405 | -2.25449 |
| H | 1.60781  | -3.43829 | -1.13946 |

#### RC1-2

|    |          |          |          |
|----|----------|----------|----------|
| Ni | -2.29629 | -1.46175 | -0.07226 |
| Ni | 1.56143  | 2.08531  | 0.7391   |
| Cl | -9.42317 | 0.64594  | -0.07764 |
| Cl | 6.46729  | 2.10827  | -4.57423 |
| O  | -3.52936 | 0.46422  | -0.32899 |
| O  | 2.85469  | 1.01895  | -0.05085 |
| N  | -3.84827 | -2.50107 | -0.45317 |

|   |          |          |          |
|---|----------|----------|----------|
| N | -1.75045 | -1.76533 | -1.89348 |
| N | 2.27927  | 3.70097  | 0.01247  |
| N | 0.00341  | 3.01214  | 1.48579  |
| C | -4.7972  | 0.46009  | -0.26741 |
| C | -5.533   | 1.7001   | -0.16984 |
| H | -4.94517 | 2.61341  | -0.15301 |
| C | -6.90265 | 1.74948  | -0.10491 |
| H | -7.41846 | 2.7024   | -0.02628 |
| C | -7.66075 | 0.55339  | -0.15183 |
| C | -7.0319  | -0.65869 | -0.26714 |
| H | -7.62286 | -1.56982 | -0.31752 |
| C | -5.60928 | -0.75177 | -0.31345 |
| C | -5.08295 | -2.06245 | -0.4913  |
| H | -5.84123 | -2.82533 | -0.7057  |
| C | -3.60572 | -3.89935 | -0.8351  |
| H | -4.3487  | -4.21414 | -1.57926 |
| H | -3.71442 | -4.55595 | 0.03946  |
| C | -2.18509 | -4.09759 | -1.40858 |
| H | -1.46068 | -4.09036 | -0.58396 |
| H | -2.12946 | -5.08322 | -1.88226 |
| C | -1.78379 | -3.02147 | -2.38555 |
| C | -1.43681 | -3.26714 | -3.71481 |
| H | -1.46263 | -4.28247 | -4.09727 |
| C | -1.04922 | -2.20266 | -4.52892 |
| H | -0.77305 | -2.37927 | -5.56449 |
| C | -1.01677 | -0.91435 | -3.9965  |
| H | -0.71876 | -0.06067 | -4.59547 |
| C | -1.37672 | -0.73292 | -2.66426 |
| H | -1.37567 | 0.23592  | -2.17995 |
| C | 3.63935  | 1.30779  | -1.04209 |
| C | 4.40774  | 0.26452  | -1.63756 |
| H | 4.30379  | -0.73396 | -1.22625 |
| C | 5.25028  | 0.5137   | -2.69901 |
| H | 5.82154  | -0.29472 | -3.14492 |
| C | 5.38483  | 1.82286  | -3.21325 |
| C | 4.68872  | 2.8657   | -2.65066 |
| H | 4.80935  | 3.87569  | -3.0322  |
| C | 3.8057   | 2.62875  | -1.56497 |
| C | 3.16758  | 3.73834  | -0.94207 |
| H | 3.48575  | 4.72737  | -1.28628 |
| C | 1.86825  | 4.99812  | 0.57515  |
| H | 1.02425  | 5.3969   | -0.00412 |
| H | 2.69973  | 5.70702  | 0.48939  |
| C | 1.45615  | 4.87408  | 2.04809  |
| H | 1.38367  | 5.87458  | 2.48642  |
| H | 2.23279  | 4.32811  | 2.59964  |
| C | 0.12467  | 4.17974  | 2.15438  |
| C | -0.96337 | 4.74043  | 2.82278  |
| H | -0.83308 | 5.67182  | 3.36465  |
| C | -2.20294 | 4.10236  | 2.77528  |
| H | -3.05757 | 4.52653  | 3.29482  |
| C | -2.32717 | 2.92862  | 2.03721  |
| H | -3.26848 | 2.40092  | 1.93504  |
| C | -1.19923 | 2.40596  | 1.41088  |
| H | -1.257   | 1.4856   | 0.8414   |
| O | -0.23234 | -1.50756 | 2.55508  |
| P | 0.33411  | -0.74661 | 1.36436  |
| O | -0.6835  | -0.49772 | 0.21482  |
| O | 1.04368  | 0.56816  | 1.75563  |
| O | 1.45642  | -1.7408  | 0.6097   |
| C | 2.58363  | -2.23528 | 1.17633  |
| C | 2.98644  | -1.9725  | 2.49791  |



|   |          |          |          |
|---|----------|----------|----------|
| C | 3.36945  | -3.06414 | 0.35417  |
| C | 4.16447  | -2.52846 | 2.9796   |
| H | 2.37894  | -1.34363 | 3.13653  |
| C | 4.54483  | -3.62028 | 0.83426  |
| H | 3.03163  | -3.25842 | -0.65877 |
| C | 4.93779  | -3.34529 | 2.14873  |
| H | 4.49198  | -2.33749 | 3.99433  |
| H | 5.15967  | -4.26047 | 0.21359  |
| N | 6.17415  | -3.92305 | 2.65892  |
| O | 6.83811  | -4.64272 | 1.90202  |
| O | 6.50305  | -3.66714 | 3.82306  |
| O | -2.69059 | -1.48801 | 1.87776  |
| H | -3.19896 | -2.27147 | 2.1365   |
| H | -1.76248 | -1.54952 | 2.31771  |

**Pre**

|    |          |          |          |
|----|----------|----------|----------|
| Ni | -1.52948 | 0.1049   | -2.15056 |
| Ni | 0.9211   | -0.56863 | 1.66511  |
| Cl | -7.733   | -2.49018 | 1.02843  |
| Cl | 1.1172   | 6.48606  | 3.13392  |
| O  | -2.41399 | -0.12866 | 0.02869  |
| O  | 1.78412  | 0.98364  | 1.14321  |
| N  | -3.30604 | 0.06552  | -2.83668 |
| N  | -1.70717 | 2.03401  | -2.13993 |
| N  | 0.52731  | 0.10665  | 3.40651  |
| N  | -0.01366 | -2.25832 | 1.99695  |
| C  | -3.56045 | -0.64528 | 0.19637  |
| C  | -3.97674 | -1.10301 | 1.50352  |
| H  | -3.25567 | -0.9832  | 2.30741  |
| C  | -5.20934 | -1.65744 | 1.74496  |
| H  | -5.48034 | -1.99246 | 2.74244  |
| C  | -6.14681 | -1.78547 | 0.69244  |
| C  | -5.83027 | -1.35344 | -0.57046 |
| H  | -6.56397 | -1.44123 | -1.36809 |
| C  | -4.55123 | -0.79932 | -0.86545 |
| C  | -4.37711 | -0.33981 | -2.20559 |
| H  | -5.30277 | -0.31434 | -2.79428 |
| C  | -3.46537 | 0.64828  | -4.17355 |
| H  | -4.47512 | 1.0662   | -4.27804 |
| H  | -3.34552 | -0.12886 | -4.94114 |
| C  | -2.4139  | 1.75253  | -4.44016 |
| H  | -1.46026 | 1.27768  | -4.70367 |
| H  | -2.73226 | 2.34525  | -5.30429 |
| C  | -2.16795 | 2.64781  | -3.25042 |
| C  | -2.36563 | 4.02901  | -3.26342 |
| H  | -2.73421 | 4.51074  | -4.16354 |
| C  | -2.07419 | 4.77225  | -2.1186  |
| H  | -2.21986 | 5.84879  | -2.11467 |
| C  | -1.59227 | 4.11819  | -0.98591 |
| H  | -1.34834 | 4.65887  | -0.07779 |
| C  | -1.42272 | 2.73674  | -1.0341  |
| H  | -1.06274 | 2.15713  | -0.1933  |
| C  | 1.61224  | 2.17749  | 1.61815  |
| C  | 2.10015  | 3.29192  | 0.87513  |
| H  | 2.58588  | 3.08797  | -0.07321 |
| C  | 1.94363  | 4.58213  | 1.33635  |
| H  | 2.31222  | 5.4201   | 0.75254  |
| C  | 1.30505  | 4.8256   | 2.57232  |
| C  | 0.84213  | 3.77866  | 3.33577  |
| H  | 0.3677   | 3.96679  | 4.29478  |
| C  | 0.97927  | 2.44576  | 2.87224  |
| C  | 0.56562  | 1.37153  | 3.71483  |

|   |          |          |          |
|---|----------|----------|----------|
| H | 0.27757  | 1.64535  | 4.73451  |
| C | 0.17286  | -0.82651 | 4.48769  |
| H | -0.91903 | -0.93895 | 4.52557  |
| H | 0.50257  | -0.41065 | 5.44675  |
| C | 0.81756  | -2.20303 | 4.28081  |
| H | 0.72499  | -2.78473 | 5.20354  |
| H | 1.88945  | -2.07669 | 4.07883  |
| C | 0.13743  | -2.93696 | 3.15514  |
| C | -0.38793 | -4.21966 | 3.31069  |
| H | -0.24128 | -4.7458  | 4.24856  |
| C | -1.10125 | -4.80104 | 2.263    |
| H | -1.51472 | -5.79998 | 2.36876  |
| C | -1.29057 | -4.07085 | 1.09326  |
| H | -1.8616  | -4.46224 | 0.25897  |
| C | -0.72833 | -2.80194 | 0.99137  |
| H | -0.86111 | -2.20324 | 0.10174  |
| O | 1.0965   | -1.94507 | -2.42281 |
| P | 1.3277   | -0.77644 | -1.40674 |
| O | 0.30503  | 0.35009  | -1.58985 |
| O | 1.47346  | -1.34308 | 0.0206   |
| O | 2.76343  | -0.07993 | -1.83111 |
| C | 3.99788  | -0.63961 | -1.6779  |
| C | 4.21335  | -2.01918 | -1.52997 |
| C | 5.08341  | 0.24956  | -1.71022 |
| C | 5.51128  | -2.49839 | -1.40145 |
| H | 3.37372  | -2.7035  | -1.52516 |
| C | 6.37958  | -0.22764 | -1.58612 |
| H | 4.8857   | 1.30913  | -1.83123 |
| C | 6.58341  | -1.60244 | -1.42819 |
| H | 5.70278  | -3.55825 | -1.28657 |
| H | 7.2298   | 0.44289  | -1.60521 |
| N | 7.94465  | -2.11109 | -1.28958 |
| O | 8.87657  | -1.29961 | -1.32823 |
| O | 8.10027  | -3.32801 | -1.13849 |
| O | -1.30844 | -1.78556 | -2.38352 |
| H | -1.86837 | -2.11838 | -3.09902 |
| H | -0.04541 | -1.99996 | -2.53518 |

## RC2

|    |          |          |          |
|----|----------|----------|----------|
| Ni | -1.47725 | 0.34329  | -2.20559 |
| Ni | 0.81917  | -0.7932  | 1.37768  |
| Cl | -7.27543 | -2.81436 | 1.24874  |
| Cl | 0.55122  | 5.91566  | 4.01042  |
| O  | -2.18984 | -0.06238 | 0.04291  |
| O  | 1.59027  | 0.87468  | 1.14768  |
| N  | -3.29865 | 0.22367  | -2.75121 |
| N  | -1.79444 | 2.25539  | -2.0306  |
| N  | 0.33663  | -0.44057 | 3.19056  |
| N  | 0.02524  | -2.58311 | 1.39627  |
| C  | -3.28869 | -0.65943 | 0.25343  |
| C  | -3.58666 | -1.2149  | 1.55581  |
| H  | -2.81966 | -1.0921  | 2.31524  |
| C  | -4.76342 | -1.8607  | 1.8459   |
| H  | -4.94382 | -2.26593 | 2.83791  |
| C  | -5.76179 | -1.99097 | 0.85221  |
| C  | -5.55996 | -1.46926 | -0.40082 |
| H  | -6.34147 | -1.55917 | -1.15151 |
| C  | -4.3411  | -0.81896 | -0.7476  |
| C  | -4.29438 | -0.27593 | -2.06882 |
| H  | -5.26279 | -0.27246 | -2.58519 |
| C  | -3.58768 | 0.86673  | -4.03701 |
| H  | -4.63357 | 1.20016  | -4.05865 |

|   |          |          |          |
|---|----------|----------|----------|
| H | -3.44829 | 0.1479   | -4.85592 |
| C | -2.6482  | 2.07176  | -4.29121 |
| H | -1.68294 | 1.69563  | -4.65291 |
| H | -3.07439 | 2.69349  | -5.08584 |
| C | -2.3848  | 2.90222  | -3.05838 |
| C | -2.69316 | 4.25931  | -2.95668 |
| H | -3.16623 | 4.76725  | -3.79122 |
| C | -2.37759 | 4.94613  | -1.78329 |
| H | -2.60884 | 6.00355  | -1.69037 |
| C | -1.7621  | 4.26027  | -0.73749 |
| H | -1.49629 | 4.75614  | 0.18992  |
| C | -1.48749 | 2.90436  | -0.89858 |
| H | -1.02476 | 2.3022   | -0.12685 |
| C | 1.33625  | 1.96089  | 1.80904  |
| C | 1.77467  | 3.20965  | 1.28049  |
| H | 2.2952   | 3.19713  | 0.32868  |
| C | 1.53127  | 4.39291  | 1.94696  |
| H | 1.86505  | 5.33634  | 1.52568  |
| C | 0.84975  | 4.38794  | 3.18337  |
| C | 0.43049  | 3.20259  | 3.74301  |
| H | -0.07853 | 3.19911  | 4.70269  |
| C | 0.65783  | 1.97769  | 3.06714  |
| C | 0.28756  | 0.75536  | 3.70315  |
| H | -0.04532 | 0.83865  | 4.74229  |
| C | 0.0108   | -1.55748 | 4.09092  |
| H | -1.07008 | -1.74869 | 4.05435  |
| H | 0.26971  | -1.28078 | 5.11939  |
| C | 0.76426  | -2.83462 | 3.70053  |
| H | 0.68296  | -3.56213 | 4.51446  |
| H | 1.83008  | -2.60389 | 3.5719   |
| C | 0.1819   | -3.42335 | 2.44262  |
| C | -0.25227 | -4.74693 | 2.37443  |
| H | -0.10404 | -5.40121 | 3.22759  |
| C | -0.87869 | -5.20505 | 1.21613  |
| H | -1.2218  | -6.23351 | 1.14791  |
| C | -1.07087 | -4.3164  | 0.16273  |
| H | -1.57326 | -4.61323 | -0.75118 |
| C | -0.60275 | -3.01066 | 0.28186  |
| H | -0.73497 | -2.29858 | -0.5239  |
| O | 1.38197  | -1.41448 | -2.89205 |
| P | 1.43613  | -0.41623 | -1.65093 |
| O | 0.38988  | 0.68509  | -1.77033 |
| O | 1.47716  | -1.24428 | -0.35737 |
| O | 2.87382  | 0.35286  | -1.84691 |
| C | 4.11138  | -0.17941 | -1.61351 |
| C | 4.37992  | -1.55621 | -1.64171 |
| C | 5.1405   | 0.74337  | -1.37624 |
| C | 5.67661  | -2.00334 | -1.41722 |
| H | 3.58418  | -2.2629  | -1.84279 |
| C | 6.43618  | 0.29897  | -1.1565  |
| H | 4.9014   | 1.80119  | -1.36695 |
| C | 6.69268  | -1.07557 | -1.1747  |
| H | 5.91016  | -3.06082 | -1.43376 |
| H | 7.24471  | 0.99441  | -0.96828 |
| N | 8.05332  | -1.55127 | -0.93565 |
| O | 8.93662  | -0.71059 | -0.73506 |
| O | 8.25391  | -2.77056 | -0.94363 |
| O | -1.1333  | -1.4713  | -2.60632 |
| H | -1.8568  | -1.82991 | -3.13902 |
| H | 0.37872  | -1.61607 | -3.01079 |

TS1

|    |          |          |          |
|----|----------|----------|----------|
| Ni | 1.44409  | 2.20669  | -0.36991 |
| Ni | -0.86975 | -1.54378 | 1.29212  |
| Cl | 8.13411  | -0.57546 | -0.08825 |
| Cl | 3.54595  | -5.50125 | -2.84973 |
| O  | 2.35811  | 0.55377  | -0.45499 |
| O  | -0.40572 | -1.85131 | -0.46673 |
| N  | 2.91683  | 3.11335  | 0.42288  |
| N  | 0.56146  | 3.92416  | -0.84744 |
| N  | -0.07178 | -3.15931 | 1.90431  |
| N  | -1.53212 | -1.03143 | 3.0766   |
| C  | 3.63583  | 0.35688  | -0.38046 |
| C  | 4.16677  | -0.91873 | -0.74066 |
| H  | 3.4702   | -1.67063 | -1.09494 |
| C  | 5.51623  | -1.18876 | -0.65707 |
| H  | 5.89707  | -2.1642  | -0.94482 |
| C  | 6.41266  | -0.20084 | -0.1965  |
| C  | 5.94918  | 1.04082  | 0.17149  |
| H  | 6.63945  | 1.7977   | 0.53385  |
| C  | 4.56769  | 1.34449  | 0.07764  |
| C  | 4.11779  | 2.62534  | 0.51956  |
| H  | 4.87005  | 3.25034  | 1.01237  |
| C  | 2.68827  | 4.42718  | 1.05538  |
| H  | 3.08979  | 5.21399  | 0.4004   |
| H  | 3.24139  | 4.46399  | 2.0007   |
| C  | 1.20325  | 4.68798  | 1.34446  |
| H  | 0.78105  | 3.79292  | 1.83993  |
| H  | 1.11226  | 5.56442  | 1.99455  |
| C  | 0.44939  | 4.90696  | 0.06972  |
| C  | -0.31717 | 6.04766  | -0.1981  |
| H  | -0.40451 | 6.81901  | 0.5604   |
| C  | -0.95903 | 6.17393  | -1.42655 |
| H  | -1.55963 | 7.05228  | -1.6457  |
| C  | -0.81393 | 5.15681  | -2.37462 |
| H  | -1.28527 | 5.21656  | -3.34994 |
| C  | -0.04517 | 4.04603  | -2.04419 |
| H  | 0.07532  | 3.20874  | -2.72186 |
| C  | 0.48385  | -2.66071 | -0.94544 |
| C  | 0.84464  | -2.55305 | -2.32025 |
| H  | 0.38125  | -1.76175 | -2.89929 |
| C  | 1.76685  | -3.4097  | -2.88123 |
| H  | 2.04012  | -3.31046 | -3.92719 |
| C  | 2.37194  | -4.42147 | -2.1001  |
| C  | 2.04625  | -4.56681 | -0.77255 |
| H  | 2.50542  | -5.35034 | -0.17649 |
| C  | 1.10488  | -3.68961 | -0.17325 |
| C  | 0.72709  | -3.89792 | 1.18238  |
| H  | 1.1381   | -4.79187 | 1.66052  |
| C  | -0.39077 | -3.65216 | 3.25026  |
| H  | 0.25501  | -3.15092 | 3.98342  |
| H  | -0.18634 | -4.72783 | 3.30146  |
| C  | -1.86021 | -3.39228 | 3.60259  |
| H  | -2.13606 | -3.99688 | 4.47267  |
| H  | -2.49533 | -3.7153  | 2.76675  |
| C  | -2.07845 | -1.9363  | 3.92166  |
| C  | -2.74594 | -1.53109 | 5.07661  |
| H  | -3.18431 | -2.28023 | 5.72833  |
| C  | -2.82831 | -0.17281 | 5.38262  |
| H  | -3.34747 | 0.15651  | 6.27867  |
| C  | -2.21572 | 0.74142  | 4.53205  |
| H  | -2.22313 | 1.80638  | 4.73878  |
| C  | -1.58124 | 0.28652  | 3.37694  |
| H  | -1.07491 | 0.97324  | 2.68287  |

|   |          |          |          |
|---|----------|----------|----------|
| O | -2.10629 | 2.46555  | 0.2005   |
| P | -1.37945 | 1.10557  | -0.33316 |
| O | -0.09273 | 1.30371  | -1.13002 |
| O | -1.76748 | 0.00481  | 0.64839  |
| O | -2.36929 | 0.8023   | -1.68276 |
| C | -3.64852 | 0.35191  | -1.67641 |
| C | -4.50755 | 0.40125  | -0.56232 |
| C | -4.12145 | -0.15646 | -2.90081 |
| C | -5.81409 | -0.05628 | -0.67907 |
| H | -4.14947 | 0.78787  | 0.38237  |
| C | -5.42513 | -0.61147 | -3.01929 |
| H | -3.44004 | -0.18605 | -3.74455 |
| C | -6.26664 | -0.55903 | -1.90224 |
| H | -6.48989 | -0.02501 | 0.167    |
| H | -5.7992  | -1.00786 | -3.95527 |
| N | -7.63855 | -1.03696 | -2.01609 |
| O | -8.01855 | -1.46612 | -3.11204 |
| O | -8.35905 | -0.99147 | -1.01134 |
| O | 0.19234  | 1.82648  | 1.55493  |
| H | 0.81901  | 1.11642  | 1.77571  |
| H | -2.19173 | 3.10945  | -0.5222  |

## IM

|    |          |          |          |
|----|----------|----------|----------|
| Ni | -2.66102 | -1.75243 | -0.31869 |
| Ni | 1.77703  | 1.18553  | 0.78588  |
| Cl | -7.31457 | 3.28094  | 2.11098  |
| Cl | -1.35223 | 6.23787  | -3.35768 |
| O  | -2.76301 | 0.00703  | 0.30822  |
| O  | 0.47355  | 1.44551  | -0.48162 |
| N  | -4.50122 | -2.128   | 0.11648  |
| N  | -2.35704 | -3.51225 | -1.17061 |
| N  | 2.58753  | 2.89345  | 0.45222  |
| N  | 3.07705  | 0.70391  | 2.20585  |
| C  | -3.79547 | 0.68931  | 0.69015  |
| C  | -3.62855 | 2.06893  | 1.01231  |
| H  | -2.63512 | 2.49228  | 0.90252  |
| C  | -4.68997 | 2.8399   | 1.43293  |
| H  | -4.54486 | 3.89077  | 1.66643  |
| C  | -5.97676 | 2.27164  | 1.56323  |
| C  | -6.18456 | 0.94516  | 1.2697   |
| H  | -7.17374 | 0.50794  | 1.37523  |
| C  | -5.10701 | 0.13574  | 0.82452  |
| C  | -5.3489  | -1.24433 | 0.56491  |
| H  | -6.36242 | -1.59445 | 0.78377  |
| C  | -5.00509 | -3.50149 | -0.00732 |
| H  | -5.32393 | -3.67925 | -1.04385 |
| H  | -5.88252 | -3.62942 | 0.6373   |
| C  | -3.93548 | -4.5298  | 0.37921  |
| H  | -3.46632 | -4.22581 | 1.3236   |
| H  | -4.41136 | -5.50242 | 0.5425   |
| C  | -2.90163 | -4.65774 | -0.70647 |
| C  | -2.55697 | -5.89518 | -1.2542  |
| H  | -3.00258 | -6.79856 | -0.84951 |
| C  | -1.6522  | -5.95344 | -2.31243 |
| H  | -1.37278 | -6.90836 | -2.74533 |
| C  | -1.11869 | -4.76433 | -2.80142 |
| H  | -0.41097 | -4.75213 | -3.62352 |
| C  | -1.48462 | -3.56541 | -2.19918 |
| H  | -1.05023 | -2.61799 | -2.49164 |
| C  | 0.11529  | 2.52185  | -1.09873 |
| C  | -1.04878 | 2.4792   | -1.92306 |
| H  | -1.57897 | 1.53483  | -1.98061 |

|   |          |          |          |
|---|----------|----------|----------|
| C | -1.4801  | 3.60198  | -2.59473 |
| H | -2.37276 | 3.56133  | -3.21153 |
| C | -0.7669  | 4.81887  | -2.48824 |
| C | 0.37181  | 4.89817  | -1.72329 |
| H | 0.9252   | 5.83076  | -1.6546  |
| C | 0.8307   | 3.75557  | -1.01591 |
| C | 2.0489   | 3.8274   | -0.28612 |
| H | 2.6043   | 4.76573  | -0.37867 |
| C | 3.90736  | 3.20025  | 1.02007  |
| H | 3.78369  | 3.58376  | 2.04214  |
| H | 4.38593  | 3.98617  | 0.42566  |
| C | 4.81217  | 1.96372  | 1.04388  |
| H | 5.84806  | 2.27464  | 1.21537  |
| H | 4.77811  | 1.46379  | 0.06764  |
| C | 4.38928  | 1.02173  | 2.13723  |
| C | 5.29839  | 0.53895  | 3.08203  |
| H | 6.34787  | 0.79456  | 2.98483  |
| C | 4.84781  | -0.26209 | 4.12763  |
| H | 5.54583  | -0.6451  | 4.86649  |
| C | 3.48736  | -0.55336 | 4.20912  |
| H | 3.08157  | -1.16159 | 5.00995  |
| C | 2.63748  | -0.0614  | 3.22547  |
| H | 1.5826   | -0.30088 | 3.20324  |
| O | 0.84603  | -3.14215 | 0.49563  |
| P | 0.25094  | -1.60112 | 0.32507  |
| O | -0.86759 | -1.37006 | -0.74769 |
| O | 0.91687  | -0.46145 | 1.17863  |
| O | 1.45095  | -1.43772 | -1.05922 |
| C | 2.76941  | -1.42292 | -1.01384 |
| C | 3.5604   | -1.95591 | 0.03975  |
| C | 3.44242  | -0.83361 | -2.12037 |
| C | 4.94232  | -1.87548 | -0.00564 |
| H | 3.06878  | -2.44185 | 0.87124  |
| C | 4.82189  | -0.75493 | -2.16654 |
| H | 2.8334   | -0.43786 | -2.92678 |
| C | 5.57699  | -1.26506 | -1.09721 |
| H | 5.54693  | -2.28381 | 0.79577  |
| H | 5.32956  | -0.29733 | -3.00757 |
| N | 7.01519  | -1.14275 | -1.11071 |
| O | 7.55776  | -0.63016 | -2.10264 |
| O | 7.65359  | -1.53998 | -0.12094 |
| O | -0.86767 | -2.02215 | 1.63286  |
| H | -1.16408 | -1.19722 | 2.0484   |
| H | 0.38984  | -3.52523 | 1.26489  |

## TS2

|    |          |          |          |
|----|----------|----------|----------|
| Ni | -2.80547 | -1.48056 | -0.44811 |
| Ni | 1.84236  | 0.71881  | 0.98083  |
| Cl | -6.85258 | 4.12221  | 1.74596  |
| Cl | -0.14662 | 6.4565   | -2.95954 |
| O  | -2.70857 | 0.3393   | -0.05169 |
| O  | 0.87117  | 1.21758  | -0.49045 |
| N  | -4.53726 | -1.6927  | 0.34901  |
| N  | -2.79583 | -3.28106 | -1.2235  |
| N  | 2.71502  | 2.41498  | 1.12373  |
| N  | 2.74844  | -0.02714 | 2.59629  |
| C  | -3.65847 | 1.13351  | 0.33151  |
| C  | -3.40958 | 2.53816  | 0.36496  |
| H  | -2.43548 | 2.88262  | 0.03297  |
| C  | -4.37588 | 3.42798  | 0.78177  |
| H  | -4.17011 | 4.49411  | 0.78878  |
| C  | -5.64049 | 2.96141  | 1.20392  |

|   |          |          |          |
|---|----------|----------|----------|
| C | -5.92361 | 1.61591  | 1.19618  |
| H | -6.89582 | 1.25895  | 1.52452  |
| C | -4.9503  | 0.68392  | 0.75195  |
| C | -5.26502 | -0.70627 | 0.79153  |
| H | -6.21936 | -0.96298 | 1.26294  |
| C | -5.0601  | -3.04865 | 0.58268  |
| H | -5.69771 | -3.33929 | -0.2637  |
| H | -5.68387 | -3.04362 | 1.4844   |
| C | -3.93863 | -4.08277 | 0.75615  |
| H | -3.19987 | -3.7133  | 1.47857  |
| H | -4.36667 | -5.01061 | 1.14961  |
| C | -3.25555 | -4.35683 | -0.55399 |
| C | -3.12884 | -5.64155 | -1.0873  |
| H | -3.4926  | -6.49148 | -0.51914 |
| C | -2.53776 | -5.81193 | -2.33655 |
| H | -2.4342  | -6.80528 | -2.76408 |
| C | -2.08323 | -4.68808 | -3.02627 |
| H | -1.61766 | -4.77064 | -4.00236 |
| C | -2.21601 | -3.4391  | -2.42982 |
| H | -1.82373 | -2.5383  | -2.88565 |
| C | 0.68118  | 2.38929  | -1.00213 |
| C | -0.26508 | 2.52538  | -2.06122 |
| H | -0.79081 | 1.63002  | -2.37482 |
| C | -0.50568 | 3.75291  | -2.6391  |
| H | -1.2337  | 3.84756  | -3.4392  |
| C | 0.19057  | 4.90271  | -2.19836 |
| C | 1.12192  | 4.81272  | -1.19226 |
| H | 1.66273  | 5.6952   | -0.86289 |
| C | 1.37975  | 3.55965  | -0.5765  |
| C | 2.3826   | 3.46837  | 0.42595  |
| H | 2.9494   | 4.38428  | 0.61667  |
| C | 3.84202  | 2.58763  | 2.051    |
| H | 3.45486  | 2.82283  | 3.05221  |
| H | 4.45377  | 3.43561  | 1.72331  |
| C | 4.71612  | 1.33248  | 2.1225   |
| H | 5.66868  | 1.58261  | 2.59987  |
| H | 4.94244  | 0.98001  | 1.10787  |
| C | 4.03013  | 0.25762  | 2.91826  |
| C | 4.66533  | -0.37909 | 3.98748  |
| H | 5.69914  | -0.13436 | 4.20759  |
| C | 3.96785  | -1.30843 | 4.75435  |
| H | 4.45037  | -1.80899 | 5.58874  |
| C | 2.63908  | -1.57459 | 4.43237  |
| H | 2.04571  | -2.28437 | 4.99856  |
| C | 2.07002  | -0.92194 | 3.34542  |
| H | 1.06278  | -1.13266 | 3.01672  |
| O | 0.41663  | -3.45544 | -0.07108 |
| P | 0.04003  | -1.8567  | 0.01314  |
| O | -0.99659 | -1.33474 | -1.02939 |
| O | 0.93858  | -0.95215 | 0.90375  |
| O | 1.35144  | -1.72328 | -1.53742 |
| C | 2.6436   | -1.51436 | -1.48104 |
| C | 3.47647  | -1.95816 | -0.40985 |
| C | 3.27371  | -0.84353 | -2.56882 |
| C | 4.84378  | -1.74491 | -0.43536 |
| H | 3.02461  | -2.47879 | 0.42653  |
| C | 4.6369   | -0.62713 | -2.59305 |
| H | 2.63951  | -0.50496 | -3.38184 |
| C | 5.42917  | -1.0719  | -1.51967 |
| H | 5.47724  | -2.10108 | 0.36902  |
| H | 5.10793  | -0.11324 | -3.42274 |
| N | 6.84839  | -0.83009 | -1.52584 |

|   |          |          |          |
|---|----------|----------|----------|
| O | 7.35402  | -0.27312 | -2.51381 |
| O | 7.51424  | -1.17837 | -0.5331  |
| O | -1.06123 | -2.25098 | 1.28285  |
| H | -1.1393  | -1.45711 | 1.83392  |
| H | 0.97026  | -3.56252 | -0.86398 |

**PC**

|    |          |          |          |
|----|----------|----------|----------|
| Ni | 1.92517  | -0.74792 | -1.34687 |
| Ni | -2.93088 | -1.22636 | 1.32959  |
| Cl | 8.62536  | -3.42686 | -0.4538  |
| Cl | -7.95447 | -0.21066 | -3.81076 |
| O  | 2.93201  | -1.91533 | -0.27393 |
| O  | -3.30087 | -1.56886 | -0.46371 |
| N  | 3.4973   | 0.02933  | -2.14688 |
| N  | 0.66963  | 0.36385  | -2.39426 |
| N  | -4.42084 | -0.03279 | 1.53813  |
| N  | -2.47296 | -1.19727 | 3.23646  |
| C  | 4.19823  | -2.22793 | -0.34856 |
| C  | 4.69906  | -3.28977 | 0.4516   |
| H  | 4.00294  | -3.82191 | 1.09243  |
| C  | 6.03189  | -3.64725 | 0.41257  |
| H  | 6.39567  | -4.46498 | 1.02676  |
| C  | 6.92994  | -2.95385 | -0.42393 |
| C  | 6.48635  | -1.91271 | -1.20751 |
| H  | 7.18019  | -1.37277 | -1.84534 |
| C  | 5.11953  | -1.53876 | -1.18802 |
| C  | 4.70564  | -0.42657 | -1.98205 |
| H  | 5.51081  | 0.10497  | -2.49834 |
| C  | 3.37044  | 1.23042  | -2.98516 |
| H  | 3.11003  | 0.92569  | -4.00774 |
| H  | 4.33474  | 1.74976  | -3.02554 |
| C  | 2.30042  | 2.18188  | -2.44469 |
| H  | 2.44727  | 2.32814  | -1.36676 |
| H  | 2.41459  | 3.16002  | -2.92203 |
| C  | 0.92197  | 1.65068  | -2.72646 |
| C  | -0.0458  | 2.43583  | -3.35578 |
| H  | 0.18614  | 3.46861  | -3.59437 |
| C  | -1.28778 | 1.88816  | -3.66529 |
| H  | -2.05003 | 2.49092  | -4.15073 |
| C  | -1.52868 | 0.55523  | -3.34304 |
| H  | -2.47885 | 0.0776   | -3.55592 |
| C  | -0.53305 | -0.17126 | -2.6994  |
| H  | -0.68983 | -1.18837 | -2.36681 |
| C  | -4.35421 | -1.2619  | -1.15046 |
| C  | -4.49605 | -1.79337 | -2.46808 |
| H  | -3.72624 | -2.4731  | -2.82004 |
| C  | -5.58282 | -1.47915 | -3.2574  |
| H  | -5.67781 | -1.90255 | -4.25276 |
| C  | -6.58401 | -0.60846 | -2.77558 |
| C  | -6.49162 | -0.07522 | -1.5106  |
| H  | -7.26447 | 0.59277  | -1.14055 |
| C  | -5.39027 | -0.39685 | -0.67794 |
| C  | -5.3154  | 0.19283  | 0.61858  |
| H  | -6.09631 | 0.9233   | 0.85219  |
| C  | -4.54648 | 0.75191  | 2.7756   |
| H  | -5.11262 | 0.16755  | 3.51389  |
| H  | -5.11349 | 1.66679  | 2.56773  |
| C  | -3.17789 | 1.12478  | 3.35842  |
| H  | -3.31332 | 1.90215  | 4.11738  |
| H  | -2.54035 | 1.54126  | 2.56779  |
| C  | -2.52382 | -0.07551 | 3.98405  |
| C  | -2.03636 | -0.06328 | 5.29232  |



|   |          |          |          |
|---|----------|----------|----------|
| H | -2.0764  | 0.85749  | 5.86518  |
| C | -1.5052  | -1.22786 | 5.84105  |
| H | -1.11585 | -1.2293  | 6.85511  |
| C | -1.485   | -2.38691 | 5.06779  |
| H | -1.08401 | -3.31973 | 5.44844  |
| C | -1.96796 | -2.33018 | 3.76566  |
| H | -1.92041 | -3.18108 | 3.09898  |
| O | -0.10453 | -0.06245 | 1.43551  |
| P | -0.04076 | -1.48946 | 0.88299  |
| O | 0.404    | -1.57042 | -0.62101 |
| O | -1.3748  | -2.27539 | 1.07881  |
| O | -0.71756 | 2.2902   | 0.64748  |
| C | 0.31461  | 3.12091  | 0.82342  |
| C | 1.53758  | 2.7024   | 1.39874  |
| C | 0.16743  | 4.46233  | 0.40842  |
| C | 2.58308  | 3.60347  | 1.53948  |
| H | 1.6344   | 1.67251  | 1.72806  |
| C | 1.21118  | 5.36113  | 0.54993  |
| H | -0.78048 | 4.77047  | -0.02132 |
| C | 2.42101  | 4.92752  | 1.11     |
| H | 3.5245   | 3.29896  | 1.98142  |
| H | 1.11063  | 6.39271  | 0.23447  |
| N | 3.52203  | 5.86442  | 1.2435   |
| O | 3.34932  | 7.03095  | 0.86334  |
| O | 4.58638  | 5.455    | 1.72621  |
| O | 1.06591  | -2.35322 | 1.70973  |
| H | 1.87567  | -2.38331 | 1.15137  |
| H | -0.48161 | 1.33193  | 0.91915  |

#### [Ni]-H<sub>2</sub>O

|    |             |             |             |
|----|-------------|-------------|-------------|
| Ni | -1.24310000 | 0.98733100  | -0.59807800 |
| Cl | 5.88377200  | -1.16308200 | 0.14772700  |
| O  | 0.58188700  | 1.33428100  | 0.95490200  |
| N  | -0.38491900 | -0.67147900 | -1.06775300 |
| N  | -2.53670700 | -0.02312000 | 0.40715000  |
| C  | 1.72866800  | 0.77826400  | 0.73703200  |
| C  | 2.90945400  | 1.26636300  | 1.38848800  |
| H  | 2.79749700  | 2.12273100  | 2.04820900  |
| C  | 4.15196700  | 0.69490900  | 1.20936000  |
| H  | 5.02007500  | 1.09933400  | 1.72166600  |
| C  | 4.28588200  | -0.42179300 | 0.36264200  |
| C  | 3.19093600  | -0.94375300 | -0.28924300 |
| H  | 3.30030800  | -1.81207600 | -0.93292700 |
| C  | 1.90623300  | -0.35889500 | -0.14044600 |
| C  | 0.84772000  | -1.02599600 | -0.85991200 |
| H  | 1.14444900  | -1.98699900 | -1.29082100 |
| C  | -1.23648600 | -1.63954400 | -1.79451700 |
| H  | -1.03063200 | -2.64922200 | -1.42439500 |
| H  | -0.98507000 | -1.61002700 | -2.86072800 |
| C  | -2.73246400 | -1.32440200 | -1.63413700 |
| H  | -2.98119700 | -0.42990400 | -2.21946900 |
| H  | -3.30870000 | -2.15868900 | -2.04297400 |
| C  | -3.12013000 | -1.08357900 | -0.20078400 |
| C  | -4.01957200 | -1.88956800 | 0.49826300  |
| H  | -4.47830000 | -2.73277600 | -0.00673200 |
| C  | -4.31625000 | -1.59894900 | 1.82882800  |
| H  | -5.01549200 | -2.21899700 | 2.38127400  |
| C  | -3.70243200 | -0.50492000 | 2.43954200  |
| H  | -3.89971600 | -0.24513100 | 3.47356700  |
| C  | -2.81448200 | 0.26131000  | 1.69474300  |
| H  | -2.30405900 | 1.11739900  | 2.12091600  |
| O  | -2.07207100 | 2.62907100  | -0.29250700 |

|   |             |            |             |
|---|-------------|------------|-------------|
| H | -2.91162500 | 2.50224800 | 0.17680100  |
| O | -0.14185100 | 2.02106000 | -1.94311300 |
| H | -0.34233600 | 2.94763300 | -1.71064800 |
| H | 0.81085800  | 1.91180500 | -1.76811300 |

**[Ni]-MeCN**

|    |             |             |             |
|----|-------------|-------------|-------------|
| Ni | 1.20856400  | 0.92019700  | -0.27598700 |
| Cl | -5.73451200 | -1.41074600 | 0.63439600  |
| O  | -0.36824500 | -0.41122700 | -1.65010900 |
| N  | 0.49203900  | -0.10219100 | 1.20673200  |
| N  | 2.71966300  | -0.28792100 | -0.29300900 |
| C  | -1.53372000 | -0.58220000 | -1.11660000 |
| C  | -2.70381900 | -0.70352400 | -1.93677100 |
| H  | -2.57263800 | -0.60815000 | -3.01143800 |
| C  | -3.96030200 | -0.94002200 | -1.41673500 |
| H  | -4.81931800 | -1.02333300 | -2.07617300 |
| C  | -4.11997200 | -1.08347500 | -0.02613800 |
| C  | -3.03688100 | -0.97931300 | 0.81944600  |
| H  | -3.16588000 | -1.09873100 | 1.89175500  |
| C  | -1.74371200 | -0.69638600 | 0.31121800  |
| C  | -0.69709200 | -0.61175300 | 1.30258700  |
| H  | -0.96259700 | -1.03205300 | 2.27809600  |
| C  | 1.36219000  | -0.20527800 | 2.39931700  |
| H  | 1.33865200  | -1.23399400 | 2.77377300  |
| H  | 0.97614000  | 0.45244500  | 3.18633600  |
| C  | 2.80988500  | 0.19704900  | 2.08420000  |
| H  | 2.85587800  | 1.27725200  | 1.89604600  |
| H  | 3.42953900  | -0.01496600 | 2.95965800  |
| C  | 3.34282200  | -0.53449900 | 0.88370500  |
| C  | 4.39505800  | -1.44893100 | 0.94834900  |
| H  | 4.88139500  | -1.62988300 | 1.90085000  |
| C  | 4.80354100  | -2.11353600 | -0.20637800 |
| H  | 5.62079500  | -2.82717100 | -0.16719900 |
| C  | 4.14560800  | -1.85337900 | -1.40890300 |
| H  | 4.42455700  | -2.35187400 | -2.33052300 |
| C  | 3.10670900  | -0.93104300 | -1.41287800 |
| H  | 2.55820400  | -0.69712700 | -2.31819800 |
| O  | 1.91727900  | 1.98359900  | -1.63932300 |
| C  | -0.97390200 | 3.09944800  | 0.15073200  |
| N  | -0.17609500 | 2.28166400  | -0.03061700 |
| C  | -1.97323100 | 4.12327500  | 0.39554700  |
| H  | -2.34053400 | 4.51590200  | -0.55738600 |
| H  | -2.80740300 | 3.69176500  | 0.95713400  |
| H  | -1.52732000 | 4.93741200  | 0.97517000  |
| H  | 2.77683600  | 1.62123400  | -1.90547000 |

**[Ni]-DMF**

|    |             |             |             |
|----|-------------|-------------|-------------|
| Ni | 1.32092600  | 0.78064800  | 0.11131700  |
| Cl | -5.29629300 | -2.49211400 | 0.25505100  |
| O  | -0.18254700 | -0.22527000 | -1.67694800 |
| N  | 0.79256000  | -0.78077000 | 1.13077900  |
| N  | 2.97112600  | -0.12081300 | -0.31575400 |
| C  | -1.29479600 | -0.68298300 | -1.20336500 |
| C  | -2.49669500 | -0.63647600 | -1.98541100 |
| H  | -2.43588800 | -0.17241800 | -2.96637700 |
| C  | -3.69537000 | -1.16686500 | -1.55020900 |
| H  | -4.57886700 | -1.11306800 | -2.17964600 |
| C  | -3.76036800 | -1.78901100 | -0.29040400 |
| C  | -2.64389000 | -1.86164500 | 0.51504600  |
| H  | -2.70142100 | -2.34621100 | 1.48588900  |
| C  | -1.41309600 | -1.28895400 | 0.10660000  |
| C  | -0.33152500 | -1.42384700 | 1.05635700  |

|   |             |             |             |
|---|-------------|-------------|-------------|
| H | -0.50716800 | -2.17610800 | 1.83238500  |
| C | 1.72155300  | -1.20033900 | 2.20388900  |
| H | 1.84943900  | -2.28726100 | 2.16565200  |
| H | 1.28899700  | -0.94322700 | 3.17749600  |
| C | 3.08942500  | -0.51528000 | 2.07698900  |
| H | 2.98331900  | 0.55439700  | 2.29917100  |
| H | 3.76477300  | -0.94382000 | 2.82238100  |
| C | 3.67454700  | -0.67331200 | 0.70083200  |
| C | 4.86167500  | -1.36160500 | 0.44584900  |
| H | 5.41200800  | -1.79305100 | 1.27497700  |
| C | 5.32088000  | -1.48340400 | -0.86430100 |
| H | 6.24411100  | -2.01500100 | -1.07355600 |
| C | 4.57685500  | -0.91820500 | -1.90073200 |
| H | 4.89148200  | -0.99522100 | -2.93546400 |
| C | 3.40381400  | -0.24379600 | -1.58641200 |
| H | 2.78675000  | 0.21167000  | -2.35237900 |
| O | 1.83356900  | 2.34545600  | -0.76614800 |
| H | 2.75837100  | 2.26698200  | -1.04797400 |
| C | -0.96003300 | 2.44852000  | 0.00268100  |
| O | -0.27382000 | 1.72710300  | 0.78255500  |
| N | -2.11842500 | 3.00059700  | 0.33769500  |
| H | -0.61590900 | 2.65222900  | -1.01220900 |
| C | -2.71503000 | 2.83236800  | 1.66276500  |
| H | -2.64570200 | 3.76833400  | 2.22682300  |
| H | -3.76899200 | 2.56555300  | 1.54591400  |
| H | -2.19872100 | 2.04167200  | 2.20525600  |
| C | -2.83236100 | 3.87604700  | -0.59415400 |
| H | -3.83401100 | 3.47745400  | -0.78001500 |
| H | -2.92257200 | 4.87875500  | -0.16487600 |
| H | -2.28688800 | 3.93745100  | -1.53703700 |
